# Supplementary material
Source: MDPI journal article supplement (https://www.mdpi.com/2311-5637/8/10/508)
Supplement: s1 [file s1]

## Supplementary material

**For “Involvement of Cytochrome P450 in organic-solvent tolerant *Bacillus subtilis* GRSW1-B1 in vanillin production via ferulic acid metabolism”**

**By Panaya Kotchaplai<sup>1,2</sup>, Jedsadakorn Ninrat<sup>3</sup>, Gumpanat Mahipant<sup>4</sup>, and Alisa S. Vangnai<sup>4,5\*</sup>**

<sup>1</sup>Institute of Biotechnology and Genetic Engineering, Chulalongkorn University, Patumwan, Bangkok, 10330, Thailand

<sup>2</sup>Water Science and Technology for Sustainable Environment Research Group, Chulalongkorn University, Bangkok 10330, Thailand

<sup>3</sup>Program in Biotechnology, Faculty of Science, Chulalongkorn University, Bangkok 10330, Thailand

<sup>4</sup>Department of Biochemistry, Faculty of Science, Chulalongkorn University, Bangkok, 10330, Thailand

<sup>5</sup>Center of Excellence in Biocatalyst and Sustainable Biotechnology, Faculty of Science, Chulalongkorn University, Bangkok 10330, Thailand

\*Corresponding author, e-mail: [alisa.v@chula.ac.th](mailto:alisa.v@chula.ac.th)

**Table S1: List of intermediates identified by GC-MS.**

| Substrate: Ferulic acid |                                    |             |                       |
|-------------------------|------------------------------------|-------------|-----------------------|
| RT (min)                | Compound                           | Peak height | %Relative peak height |
| 15.602                  | 4-vinylguaiacol                    | 30796074.5  | 34                    |
| 16.838                  | Vanillin                           | 10519322.05 | 11.62                 |
| 16.97                   | Unidentified compound              | 19984988.73 | 22.07                 |
| 17.045                  | Methylhydroquinone                 | 3458829.12  | 3.82                  |
| 17.425                  | Naphthalene                        | 16542167.89 | 18.27                 |
| 17.671                  | Dihydroxybenzoic acid methyl ester | 90566554.37 | 100                   |
| 18.583                  | Hydroxy-benzoic acid               | 13003554.28 | 14.36                 |
| 19.509                  | Vanillic acid                      | 775302.57   | 0.86                  |
| 20.348                  | Vanylglycol                        | 2971093.42  | 3.28                  |
| 22.775                  | Ferulic acid                       | 13228771.07 | 14.61                 |
| 27.375                  | Dihydroxybenzoic acid              | 7586645.17  | 8.38                  |
| Substrate: Vanillin     |                                    |             |                       |
| RT (min)                | Compound                           | Peak height | %Relative peak height |
| 12.606                  | Guaiacol                           | 146974032.1 | 100                   |
| 16.976                  | Unidentified compound              | 83034273.53 | 56.5                  |
| 18.122                  | Vanillyl alcohol                   | 36003431.71 | 24.5                  |
| 19.512                  | Vanillic acid                      | 1424148.62  | 0.97                  |
| 20.142                  | Protocatechuic acid                | 1145710.05  | 0.78                  |
